# Supplementary material for: The crystalline/amorphous contact in Cu2O/Ta2O5 heterostructures: increasing its sunlight-driven overall water splitting efficiency
Source: Royal Society of Chemistry journal article supplement (doi:10.1039/c6ta10728a), 2017-01-01
Supplement: c6ta10728a1.pdf [file c6ta10728a1.pdf]

## Supporting Information

### The Crystalline/Amorphous Contact in $\text{Cu}_2\text{O}/\text{Ta}_2\text{O}_5$ Heterostructures: Increasing Its Sunlight-Driven Overall Water Splitting Efficiency

Zirui Lou<sup>a,b,1</sup>, Yaguang Li<sup>a,b,1</sup>, Liping Zhu<sup>a,b,\*</sup>, Weiyu Xie<sup>c</sup>, Wenzhe Niu<sup>a,b</sup>, Hui Song<sup>a,b</sup>, Zhizhen Ye<sup>a,b</sup> and Shengbai Zhang<sup>c</sup>

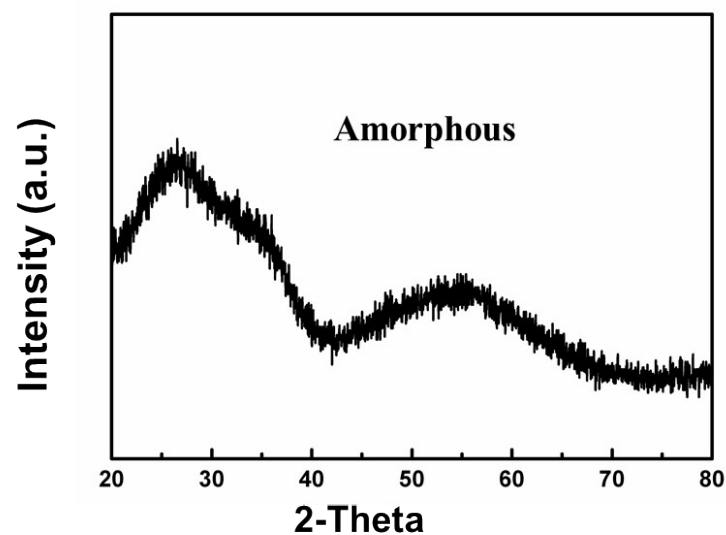

**Fig. S1** The XRD pattern of pure amorphous  $\text{Ta}_2\text{O}_5$  hollow spheres.

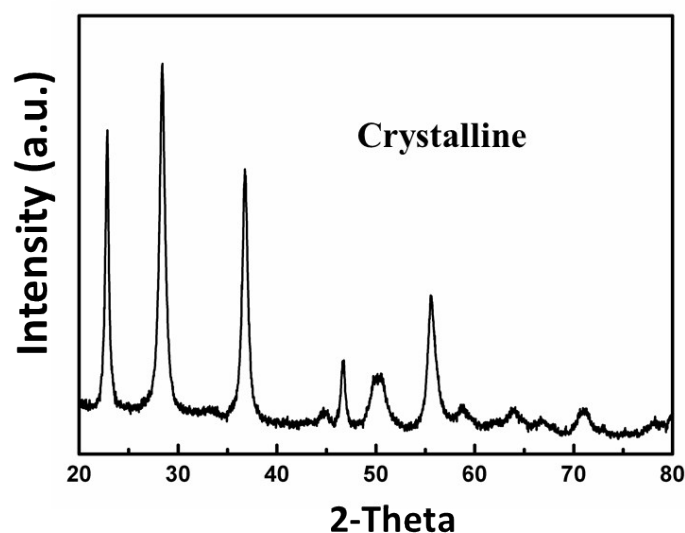

**Fig. S2** The XRD pattern of pure crystalline  $\text{Ta}_2\text{O}_5$  hollow spheres.

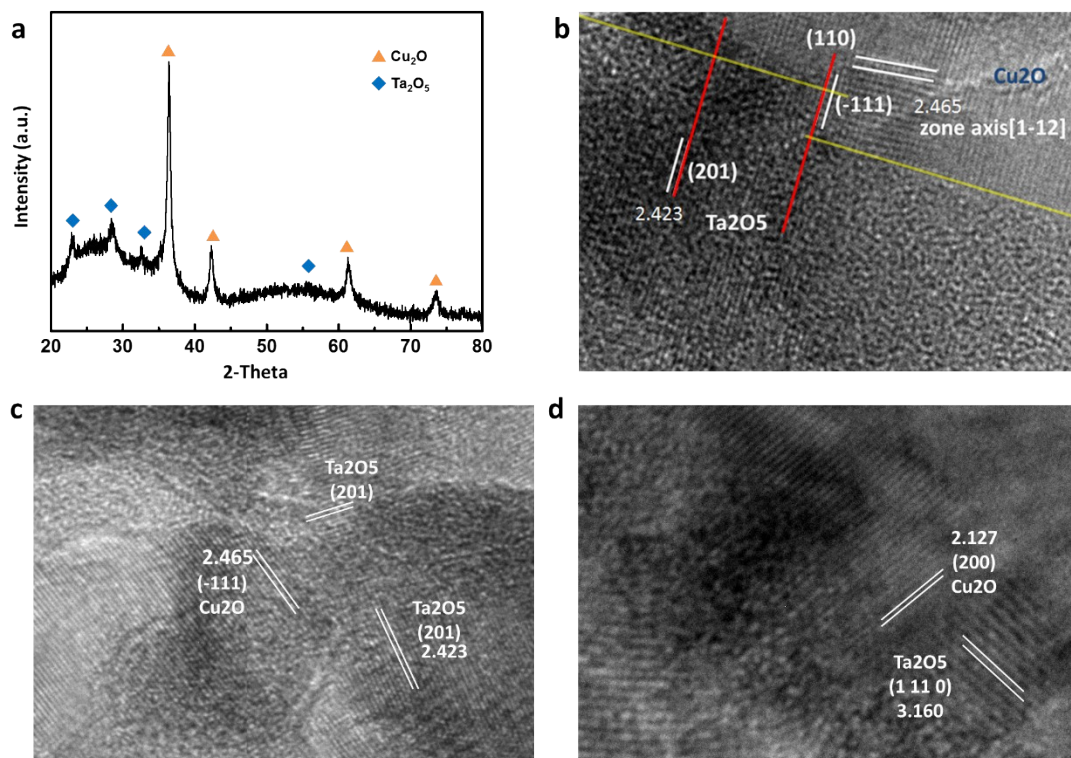

**Fig. S3** (a) The XRD pattern of crystalline  $\text{Cu}_2\text{O}$ /crystalline  $\text{Ta}_2\text{O}_5$  heterostructure. (b)(c)(d) The HRTEM images of interface between the crystalline  $\text{Cu}_2\text{O}$  and crystalline  $\text{Ta}_2\text{O}_5$ .

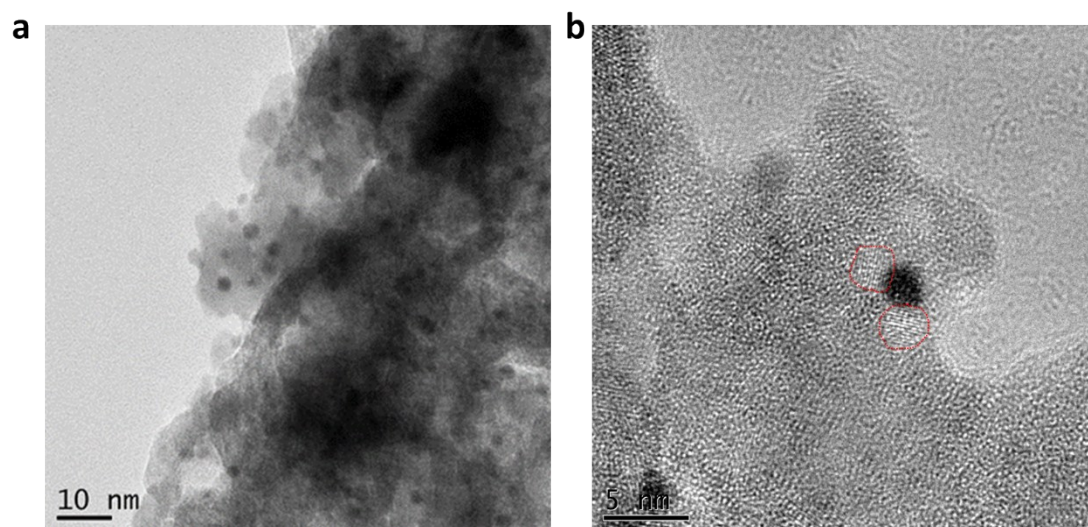

**Fig. S4** (a) The TEM image and (b) HRTEM image of Pt decorated  $\text{Cu}_2\text{O}$ /amorphous  $\text{Ta}_2\text{O}_5$  heterostructure.

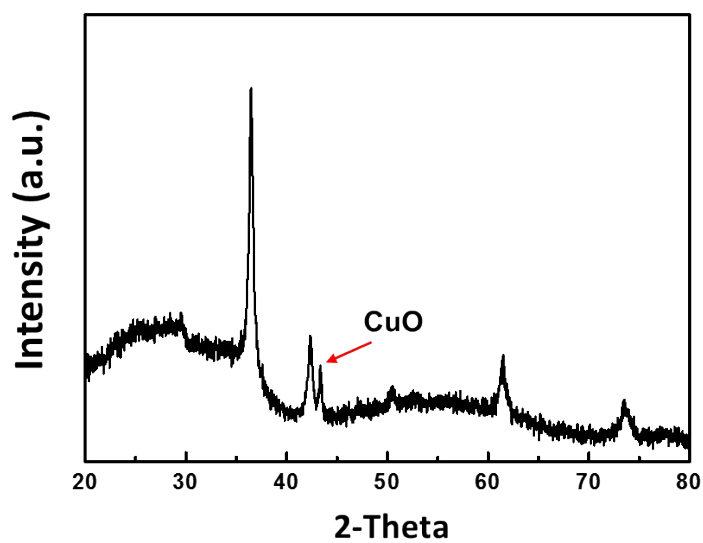

**Fig. S5** The XRD pattern of  $\text{Cu}_2\text{O}/\text{amorphous Ta}_2\text{O}_5$  heterostructure after 1 hour water splitting test.

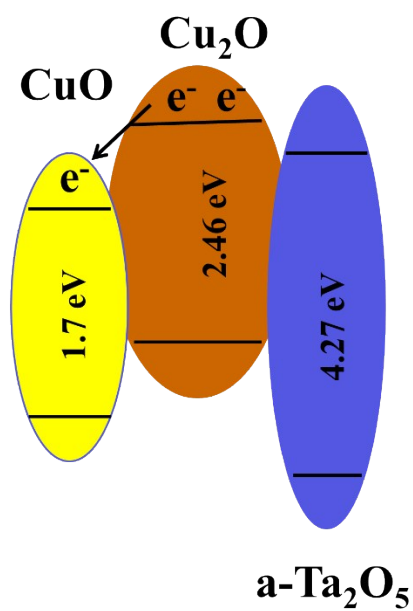

**Fig. S6** The band structure diagram of  $\text{CuO}/\text{Cu}_2\text{O}/\text{amorphous Ta}_2\text{O}_5$  heterostructure.
